# Supplementary material for: What names for covert awareness? A systematic review
Source: Front Hum Neurosci. 2022 Aug 5;16:971315. doi: 10.3389/fnhum.2022.971315 (PMC9389234; doi:10.3389/fnhum.2022.971315)
Supplement: Supplementary file 1 [file Data_Sheet_1.xlsx]

## Sheet: Included_Clean
Title	Publication year	DOI
A feasibility study of an improved procedure for using EEG to detect brain responses to imagery instruction in patients with disorders of consciousness	2014	DOI: 10.1371/journal.pone.0099289
A gaze-independent audiovisual brain-computer Interface for detecting awareness of patients with disorders of consciousness	2018	DOI: 10.1186/s12883-018-1144-y
A hierarchy of event-related potential markers of auditory processing in disorders of consciousness	2016	DOI: 10.1016/j.nicl.2016.08.003
A network approach to assessing cognition in disorders of consciousness	2010	DOI: 10.1212/WNL.0b013e3181feb259
A Novel Audiovisual Brain-Computer Interface and Its Application in awareness Detection	2015	DOI: 10.1038/srep09962
A P300-based cognitive assessment battery	2015	DOI: 10.1002/brb3.336
An Auditory BCI System for Assisting CRS-R Behavioral Assessment in Patients with Disorders of consciousness	2016	DOI: 10.1038/srep32917
An ethics of welfare for patients diagnosed as vegetative with covert awareness	2015	https://doi.org/10.1080/21507740.2015.1014072
Are there islands of awareness?	2019	DOI: 10.1016/j.tins.2019.11.003
Are You There? The Growing Need to Get the Right Diagnosis in Disorder of consciousness	2018	DOI: 10.1097/JNN.0000000000000354
Assessment of covert consciousness in the Intensive Care Unit: Clinical and Ethical Considerations	2018	DOI: 10.1097/HTR.0000000000000448
Assessment of Statistically Significant Command-Following in Pediatric Patients with Disorders of consciousness, Based on Visual, Auditory and Tactile Event-Related Potentials	2018	DOI: 10.1142/S012906571850048X
Auditory and Somatosensory P3 Are Complementary for the Assessment of Patients with Disorders of consciousness	2020	DOI: 10.3390/brainsci10100748
Automated pupillometry to detect command following in neurological patients: a proof-of-concept study	2019	DOI: 10.7717/peerj.6929
Autonomic responses to emotional linguistic stimuli and amplitude of low-frequency fluctuations predict outcome after severe brain injury	2020	DOI: 10.1016/j.nicl.2020.102356
Basic discriminative and semantic processing in patients in the vegetative and minimally conscious state	2016	DOI: 10.1016/j.ijpsycho.2016.12.012
Bedside detection of awareness in the vegetative state: a cohort study	2011	DOI: 10.1016/S0140-6736(11)61224-5
Behavioral assessment in patients with disorders of consciousness: gold standard or fool's gold?	2009	DOI: 10.1016/S0079-6123(09)17704-X
Brain imaging reveals covert consciousness during behavioral unresponsiveness induced by propofol	2018	DOI: 10.1038/s41598-018-31436-z
Brain–computer interfacing in disorders of consciousness	2012	DOI: 10.3109/02699052.2012.698362
Bridging the Gap Towards awareness Detection in Disorders of consciousness: An Experimental Study on the Mirror Neuron System	2018	DOI: 10.1007/s10548-018-0628-9
Can mental imagery functional magnetic resonance imaging predict recovery in patients with disorders of consciousness?	2013	DOI: 10.1016/j.apmr.2012.11.053
Can self-relevant stimuli help assessing patients with disorders of consciousness?	2016	DOI: 10.1016/j.concog.2016.06.013
Can they feel? The capacity for pain and pleasure in patients with cognitive motor dissociation	2019	DOI: 10.1007/s12152-018-9361-z
Cerebral response to speech in vegetative and minimally conscious states after traumatic brain injury	2008	DOI: 10.1080/02699050802403573
Characterization of EEG signals revealing covert cognition in the injured brain	2018	DOI: 10.1093/brain/awy070
Cognition in the vegetative state	2012	DOI: 10.1146/annurev-clinpsy-032511-143050
Cognitive Motor Dissociation Following Severe Brain Injuries	2015	DOI: 10.1001/jamaneurol.2015.2899
Cognitive processes in disorders of consciousness as revealed by EEG time-frequency analyses	2011	DOI: 10.1016/j.clinph.2011.03.004
Coma and consciousness: paradigms (re) framed by neuroimaging	2012	DOI: 10.1016/j.neuroimage.2011.12.041
Combination of diffusion tensor and functional magnetic resonance imaging during recovery from the vegetative state	2010	DOI: 10.1186/1471-2377-10-77
Communication in patients with disorders of consciousness–lessons learned From InteRDoCTor project	2016	https://doi.org/10.12775/MBS.2016.032
Comparison of EEG-features and classification methods for motor imagery in patients with disorders of consciousness	2013	DOI: 10.1371/journal.pone.0080479
conscious awareness in patients in vegetative states: myth or reality?	2013	DOI: 10.1007/s11910-013-0395-7
consciousness, intention, and command-following in the vegetative state	2017	https://doi.org/10.1093/bjps/axv012
Cortical connectivity modulation induced by cerebellar oscillatory transcranial direct current stimulation in patients with chronic disorders of consciousness: A marker of covert cognition?	2016	DOI: 10.1016/j.clinph.2015.12.010
Cortical Function in Acute Severe Traumatic Brain Injury and at Recovery: A Longitudinal fMRI Case Study	2020	DOI: 10.3390/brainsci10090604
Cortical response to the natural speech envelope correlates with neuroimaging evidence of cognition in severe brain injury	2018	DOI: 10.1016/j.cub.2018.10.057
Covert consciousness: Searching for volitional brain activity in the unresponsive	2018	DOI: 10.1016/j.cub.2018.10.022
Detecting and interpreting conscious experiences in behaviorally non-responsive patients	2017	DOI: 10.1016/j.neuroimage.2015.11.059
Detecting awareness after severe brain injury	2013	DOI: 10.1038/nrn3608
Detecting awareness in patients with disorders of consciousness using a hybrid brain-computer interface	2014	DOI: 10.1088/1741-2560/11/5/056007
Detecting Awareness in the Vegetative State	2006	DOI: 10.1126/science.1130197
Detecting awareness in the vegetative state: electroencephalographic evidence for attempted movements to command	2012	DOI: 10.1371/journal.pone.0049933
Detecting Brain Activity Following a Verbal Command in Patients With Disorders of consciousness	2019	DOI: 10.3389/fnins.2019.00976
Detecting consciousness: a unique role for neuroimaging	2012	DOI: 10.1146/annurev-psych-113011-143729
Detecting number processing and mental calculation in patients with disorders of consciousness using a hybrid brain-computer interface system	2015	DOI: 10.1186/s12883-015-0521-z
Detecting the Potential for consciousness in Unresponsive Patients Using the Perturbational Complexity Index	2020	DOI: 10.3390/brainsci10120917
Determination of awareness in patients with severe brain injury using EEG power spectral analysis	2011	DOI: 10.1016/j.clinph.2011.03.022
Diagnostic precision of PET imaging and functional MRI in disorders of consciousness: a clinical validation study	2014	DOI: 10.1016/S0140-6736(14)60042-8
Diagnostic, prognostic, and advanced imaging in severe traumatic brain injury	2015	https://doi.org/10.1007/s40719-015-0018-7
Discontinuation of artificial nutrition and hydration and covert cognition	2020	DOI: 10.1080/02699052.2020.1786602
Disorders of consciousness and N400 ERP measures in response to a semantic task	2013	DOI: 10.1176/appi.neuropsych.12090227
Dissociable endogenous and exogenous attention in disorders of consciousness	2013	DOI: 10.1016/j.nicl.2013.10.008
Dissociations between behavioural and functional magnetic resonance imaging-based evaluations of cognitive function after brain injury	2011	DOI: 10.1093/brain/awr005
Do unresponsive wakefulness syndrome patients feel pain? Role of laser-evoked potential-induced gamma-band oscillations in detecting cortical pain processing	2016	DOI: 10.1016/j.neuroscience.2016.01.009
Do vegetative patients retain aspects of language comprehension? Evidence from fMRI	2007	DOI: 10.1093/brain/awm170
Early detection of consciousness in patients with acute severe traumatic brain injury	2017	DOI: 10.1093/brain/awx176
Early discrimination of cognitive motor dissociation from disorders of consciousness: Pitfalls and clues	2021	DOI: 10.1007/s00415-020-10125-w
EEG-detected olfactory imagery to reveal covert consciousness in minimally conscious state	2015	DOI: 10.3109/02699052.2015.1075251
Electromyographic decoding of response to command in disorders of consciousness	2016	DOI: 10.1212/WNL.0000000000003333
Electrophysiological and Neuroimaging Studies–During Resting State and Sensory Stimulation in Disorders of consciousness: A Review	2020	DOI: 10.3389/fnins.2020.555093
Emotional processing of personally familiar faces in the vegetative state	2013	DOI: 10.1371/journal.pone.0074711
European Academy of Neurology guideline on the diagnosis of coma and other disorders of consciousness	2020	DOI: 10.1111/ene.14151
Event related potentials elicited by violations of auditory regularities in patients with impaired consciousness	2012	DOI: 10.1016/j.neuropsychologia.2011.12.015
Exploring impaired consciousness: the MRI approach	2007	DOI: 10.1097/WCO.0b013e3282f169ec
Extending communication for patients with disorders of consciousness	2014	DOI: 10.1111/j.1552-6569.2012.00744.x
Familiar auditory sensory training in chronic traumatic brain injury: a case study	2017	DOI: 10.1080/09638288.2016.1277403
Feasibility of an EEG-based brain-computer interface in the intensive care unit	2018	DOI: 10.1016/j.clinph.2018.04.747
Finding a way in: a review and practical evaluation of fMRI and EEG for detection and assessment in disorders of consciousness	2013	DOI: 10.1016/j.neubiorev.2013.05.004
fMRI study of graduated emotional charge for detection of covert activity using passive listening to narratives	2017	DOI: 10.1016/j.neuroscience.2017.02.048
From unresponsive wakefulness to minimally conscious PLUS and functional locked-in syndromes: recent advances in our understanding of disorders of consciousness	2011	DOI: 10.1007/s00415-011-6114-x
Functional evaluation of awareness in vegetative and minimally conscious state	2017	DOI: 10.2174/1874440001711010017
Functional locked-in syndrome as recovery phase of vegetative state	2013	DOI: 10.3109/02699052.2013.809555
Functional MRI motor imagery tasks to detect command following in traumatic disorders of consciousness	2017	DOI: 10.3389/fneur.2017.00688
Functional near infrared spectroscopy as a probe of brain function in people with prolonged disorders of consciousness	2016	DOI: 10.1016/j.nicl.2016.07.013
Functional neuroimaging approaches to the changing borders of consciousness	2010	DOI:10.1027/0269-8803/a000015
Functional neuroimaging of the vegetative state	2008	DOI: 10.1038/nrn2330
How Does Functional Neurodiagnostics Inform Surrogate Decision-Making for Patients with Disorders of consciousness? A Qualitative Interview Study with Patients' …	2020	https://doi.org/10.1007/s12152-019-09425-4
How far can we go in chronic disorders of consciousness differential diagnosis? The use of neuromodulation in detecting internal and external awareness	2017	DOI: 10.1016/j.neuroscience.2017.02.053
Human consciousness is supported by dynamic complex patterns of brain signal coordination	2019	DOI: 10.1126/sciadv.aat7603
Implementing novel imaging methods for improved diagnosis of disorder of consciousness patients	2013	DOI: 10.1016/j.jns.2013.08.009
Improved concept and first results of an auditory single-switch BCI for the future use in disorders of consciousness patients	2015	DOI: 10.1109/EMBC.2015.7318754
Individualized assessment of residual cognition in patients with disorders of consciousness	2020	DOI: 10.1016/j.nicl.2020.102472
Influence of inter-stimulus interval of spinal cord stimulation in patients with disorders of consciousness: A preliminary functional near-infrared spectroscopy study	2018	DOI: 10.1016/j.nicl.2017.09.017
Information processing in patients in vegetative and minimally conscious states	2016	DOI: 10.1016/j.clinph.2015.07.020
Is there a cartesian renaissance of the mind or is it time for a new taxonomy for low responsive states?	2012	DOI: 10.1089/neu.2009.1257
Making every word count for nonresponsive patients	2013	DOI: 10.1001/jamaneurol.2013.3686
Managing disorders of consciousness: The role of electroencephalography	2021	DOI: 10.1007/s00415-020-10095-z
Measures of metabolism and complexity in the brain of patients with disorders of consciousness	2017	DOI: 10.1016/j.nicl.2017.02.002
Measuring consciousness in coma and related states	2014	DOI: 10.4329/wjr.v6.i8.589
Measuring consciousness in severely damaged brains	2014	DOI: 10.1146/annurev-neuro-062012-170339
Measuring states of pathological (un) consciousness: research dimensions, clinical applications, and ethics	2017	DOI: 10.1093/nc/nix010
Measuring the fading consciousness in the human brain	2011	DOI: 10.1097/WCO.0b013e328347da94
Metaplasticity: A Promising Tool to Disentangle Chronic Disorders of consciousness Differential Diagnosis	2017	DOI: 10.1142/S0129065717500599
Mirroring of a simple motor behavior in disorders of consciousness	2012	DOI: 10.1016/j.clinph.2012.05.016
Motor attempt EEG paradigm as a diagnostic tool for disorders of consciousness	2018	DOI: 10.1109/EMBC.2018.8513217
MRI in disorders of consciousness	2020	DOI: 10.1097/WCO.0000000000000873
Multimodal FDG-PET and EEG assessment improves diagnosis and prognostication of disorders of consciousness	2021	DOI: 10.1016/j.nicl.2021.102601
Multiple tasks and neuroimaging modalities increase the likelihood of detecting covert awareness in patients with disorders of consciousness	2014	DOI: 10.3389/fnhum.2014.00950
Neural signature of the conscious processing of auditory regularities	2009	DOI: 10.1073/pnas.0809667106
Neuroimaging studies on disorders of consciousness: a meta-analytic evaluation	2019	DOI: 10.3390/jcm8040516
Neurophysiological Indicators of Residual Cognitive Capacity in the minimally conscious state	2015	DOI: 10.1155/2015/145913
Neurosensory stimulation outdoors enhances cognition recovery in cognitive motor dissociation: A prospective crossover study	2019	DOI: 10.3233/NRE-192692
Normal brain response to propofol in advance of recovery from unresponsive wakefulness syndrome	2016	DOI: 10.3389/fnhum.2016.00248
Oscillatory brain activity in vegetative and minimally conscious state during a sentence comprehension task	2011	NA
Our rapidly changing understanding of acute and chronic disorders of consciousness: challenges for neurologists	2012	https://doi.org/10.2217/fnl.12.77
P300 latency Jitter occurrence in patients with disorders of consciousness: Toward a better design for Brain Computer Interface applications	2015	DOI: 10.1109/EMBC.2015.7319803
Patients with unresponsive wakefulness syndrome respond to the pain cries of other people	2012	DOI: 10.1212/WNL.0b013e31827f0846
Pattern classification of volitional functional magnetic resonance imaging responses in patients with severe brain injury	2012	DOI: 10.1001/archneurol.2011.892
Peri-personal space encoding in patients with disorders of consciousness and cognitive-motor dissociation	2019	DOI: 10.1016/j.nicl.2019.101940
Preservation of electroencephalographic organization in patients with impaired consciousness and imaging-based evidence of command-following	2014	DOI: 10.1002/ana.24283
Preserved covert cognition in noncommunicative patients with severe brain injury?	2015	DOI: 10.1177/1545968314547767
Preserved somatosensory discrimination predicts consciousness recovery in unresponsive wakefulness syndrome	2018	DOI: 10.1016/j.clinph.2018.02.131
Probing command following in patients with disorders of consciousness using a brain-computer interface	2012	DOI: 10.1016/j.clinph.2012.04.030
Probing consciousness with event-related potentials in the vegetative state	2011	DOI: 10.1212/WNL.0b013e3182217ee8
Probing ERP correlates of verbal semantic processing in patients with impaired consciousness	2015	DOI: 10.1093/brain/awaa026
Prognosis for patients with cognitive motor dissociation identified by brain-computer interface	2020	DOI: 10.1093/brain/awaa026
Prognostic and diagnostic value of clinical examination and fMRI in the evaluation of patients in a vegetative state	2017	doi: 10.2174/1874440001711010017
Quantitative assessment of visual behavior in disorders of consciousness	2012	DOI: 10.1007/s00415-012-6435-4
Reaching across the abyss: recent advances in functional magnetic resonance imaging and their potential relevance to disorders of consciousness	2009	DOI: 10.1016/S0079-6123(09)17718-X
Recent advances in disorders of consciousness focus on the diagnosis	2014	DOI: 10.3109/02699052.2014.920522
Recovery from disorders of consciousness: mechanisms, prognosis and emerging therapies	2021	DOI: 10.1038/s41582-020-00428-x
Recovery of consciousness after brain injury: a mesocircuit hypothesis	2010	DOI: 10.1016/j.tins.2009.11.002
Recovery of cortical effective connectivity and recovery of consciousness in vegetative patients	2012	DOI: 10.1093/brain/awr340
Reduced delta-band modulation underlies the loss of P300 responses in disorders of consciousness	2018	DOI: 10.1016/j.clinph.2018.09.104
Relationship between etiology and covert cognition in the minimally conscious state	2012	DOI: 10.1212/WNL.0b013e318249f764
Sensorimotor modulation assessment and brain-computer interface training in disorders of consciousness	2015	DOI: 10.1016/j.apmr.2014.08.024
Shaping thalamo-cortical plasticity: a marker of cortical pain integration in patients with post-anoxic unresponsive wakefulness syndrome?	2015	DOI: 10.1016/j.brs.2014.09.001
Shining a light on awareness: a review of functional near-infrared spectroscopy for prolonged disorders of consciousness	2018	DOI: 10.3389/fneur.2018.00350
Single-trial decoding of auditory novelty responses facilitates the detection of residual consciousness	2013	DOI: 10.1016/j.neuroimage.2013.07.013
Somatosensory attention identifies both overt and covert awareness in disorders of consciousness	2016	DOI: 10.1002/ana.24726
Source imaging of QEEG as a method to detect awareness in a person in vegetative state	2011	DOI: 10.3109/02699052.2011.558045
Spectral signatures of reorganised brain networks in disorders of consciousness	2014	DOI: 10.1371/journal.pcbi.1003887
Technology-based assessment in patients with disorders of consciousness	2014	DOI: 10.4415/ANN_14_03_03
Thalamo-frontal connectivity mediates top-down cognitive functions in disorders of consciousness	2015	DOI: 10.1212/WNL.0000000000001123
The auditory p300-based SSBCI: a door to minimally conscious patients?	2012	DOI: 10.1109/EMBC.2012.6347009
The Clinical Diagnostic Utility of Electrophysiological Techniques in Assessment of Patients with Disorders of Consciousness Following Acquired Brain Injury: A Systematic Review	2017	DOI: 10.1097/HTR.0000000000000267
The neural basis of external responsiveness in prolonged disorders of consciousness	2019	DOI: 10.1016/j.nicl.2019.101791
The neural correlates of lexical processing in disorders of consciousness	2017	DOI: 10.1007/s11682-016-9613-7
The Quest for Covert consciousness: Bringing Neuroethics to the Bedside	2021	DOI: 10.1212/WNL.0000000000011734
The relationship between coma near coma, disability ratings, and event-related potentials in patients with disorders of consciousness: a semantic association task	2015	DOI: 10.1007/s10484-015-9304-y
The reliability of the N400 in single subjects: implications for patients with disorders of consciousness	2014	DOI: 10.1016/j.nicl.2014.05.001
The Role of Neuroimaging Techniques in Establishing Diagnosis, Prognosis and Therapy in Disorders of consciousness	2016	DOI: 10.2174/1874440001610010052
The Trace Conditional Learning of the Noxious Stimulus in UWS Patients and Its Prognostic Value in a GSR and HRV Entropy Study	2020	DOI: 10.3389/fnhum.2020.00097
Toward Improving Diagnostic Strategies in Chronic Disorders of consciousness: An Overview on the (Re-) Emergent Role of Neurophysiology	2020	DOI: 10.3390/brainsci10010042
Towards a method to differentiate chronic disorder of consciousness patients' awareness: The Low-Resolution Brain Electromagnetic Tomography Analysis	2016	DOI: 10.1016/j.jns.2016.07.016
Towards New Diagnostic Approaches in Disorders of consciousness: A Proof of Concept Study on the Promising Use of Imagery Visuomotor Task	2020	DOI: 10.3390/brainsci10100746
Towards the routine use of brain imaging to aid the clinical diagnosis of disorders of consciousness	2009	DOI: 10.1093/brain/awp183
Towards using fNIRS recordings of mental arithmetic for the detection of residual cognitive activity in patients with disorders of consciousness (DOC)	2018	DOI: 10.1016/j.bandc.2018.06.002
Uncovering consciousness in unresponsive ICU patients: technical, medical and ethical considerations	2019	DOI: 10.1186/s13054-019-2370-4
Update on diagnosis in disorders of consciousness	2020	DOI: 10.1080/14737175.2020.1796641
Using functional magnetic resonance imaging and electroencephalography to detect consciousness after severe brain injury	2015	DOI: 10.1016/B978-0-444-52892-6.00018-0
Using functional magnetic resonance imaging to detect covert awareness in the vegetative state	2007	DOI: 10.1001/archneur.64.8.1098
Using neuroimaging to uncover awareness in brain-injured and anesthetized patients	2018	DOI: 10.2741/S520
Visual cognition in disorders of consciousness: From V1 to top‐down attention	2013	DOI: 10.1002/hbm.21507
Visual Fixation Assessment in Patients with Disorders of consciousness Based on Brain-Computer Interface	2018	DOI: 10.1007/s12264-018-0257-z
Volitional electromyographic responses in disorders of consciousness	2014	DOI: 10.3109/02699052.2014.920519
Voluntary brain processing in disorders of consciousness	2009	DOI: 10.1212/WNL.0b013e3181bd68bc
When thoughts become action: an fMRI paradigm to study volitional brain activity in non-communicative brain injured patients	2007	DOI: 10.1016/j.neuroimage.2007.02.047
Willful modulation of brain activity in disorders of consciousness	2010	DOI: 10.1056/NEJMoa0905370
